# Supplementary material for: Effect of Environment on Acetylated Cellulose Nanocrystal-Reinforced Biopolymers Films
Source: MDPI journal article supplement (doi:10.3390/polym15071663), 2023-03-27
Supplement: s1 [file s1]

Supplementary

# Effect of Environment on Acetylated Cellulose Nanocrystal-Reinforced Biopolymers Films

Ana Oberlintner <sup>1,2</sup>, Blaž Likozar <sup>2</sup> and Uroš Novak <sup>1,\*</sup>

<sup>1</sup> Department of Catalysis and Chemical Reaction Engineering, National Institute of Chemistry, SI-1000 Ljubljana, Slovenia

<sup>2</sup> International Postgraduate School Jožef Stefan, SI-1000 Ljubljana, Slovenia

\* Correspondence: uros.novak@ki.si

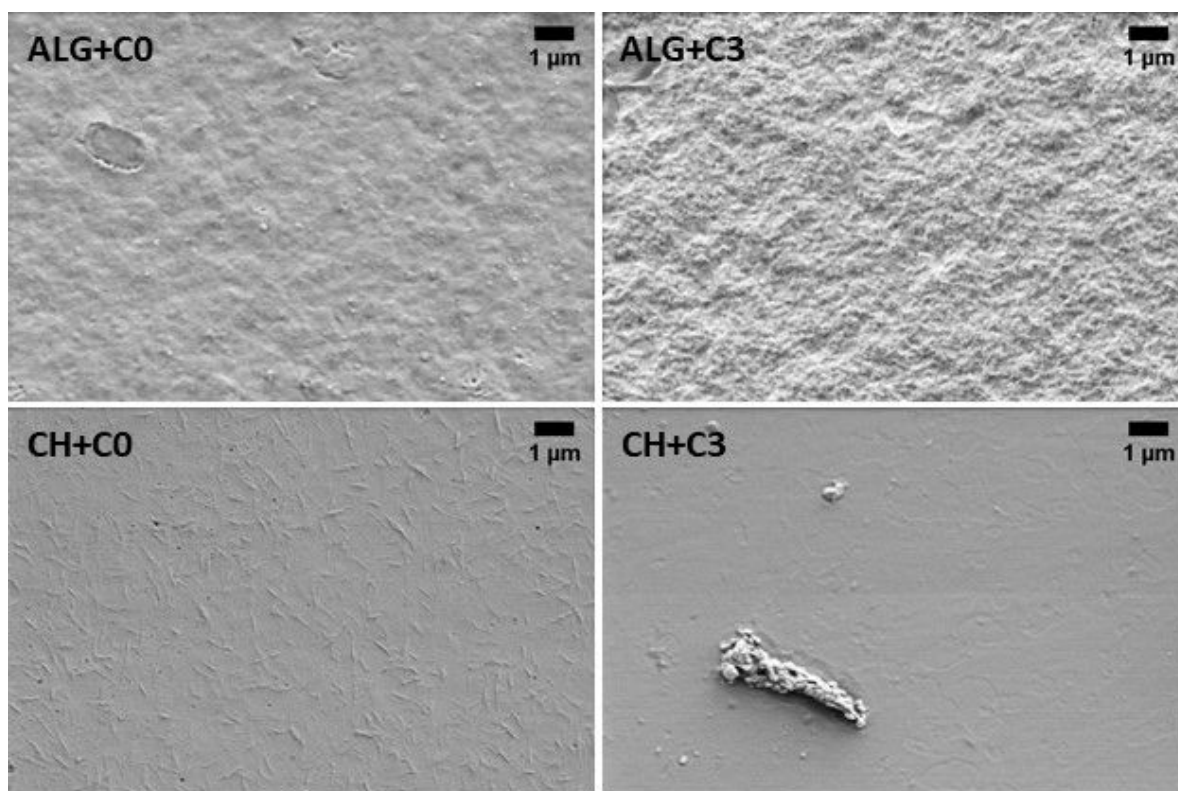

Figure S1. SEM micrographs of alginate films with pristine CNCs (ALG+C0), alginate films with acetylated CNCs (ALG+C3), chitosan films with pristine CNCs (CH+C0), chitosan films with acetylated CNCs (CH+C3) in the upper part.
